# Supplementary material for: Potentiometric, spectroscopic, electrochemical and DFT characterization of oxovanadium(iv) complexes formed by citrate and tartrates in aqueous solution at high ligand to metal molar ratios: the effects of the trigonal bipyramidal distortion in bis-chelated species and biological implications
Source: Royal Society of Chemistry journal article supplement (doi:10.1039/b803520b), 2008-01-01
Supplement: b803520b.pdf [file b803520b.pdf]

**Table S-1** Fitting parameters for the three speciation models considered

| $\log\beta_{pqr}$                               | Model 1 <sup>a</sup> |             |            |            | Model 2 <sup>b</sup> |             |            |            | Model 3 <sup>c</sup> |             |            |            |
|-------------------------------------------------|----------------------|-------------|------------|------------|----------------------|-------------|------------|------------|----------------------|-------------|------------|------------|
|                                                 | Citrate              | DL-tartrate | D-tartrate | L-tartrate | Citrate              | DL-tartrate | D-tartrate | L-tartrate | Citrate              | DL-tartrate | D-tartrate | L-tartrate |
| LH                                              | 5.57                 | 3.87        | 3.87       | 3.87       | 5.57                 | 3.87        | 3.87       | 3.87       | 5.57                 | 3.87        | 3.87       | 3.87       |
| LH <sub>2</sub>                                 | 9.84                 | 6.63        | 6.65       | 6.65       | 9.84                 | 6.63        | 6.65       | 6.65       | 9.84                 | 6.63        | 6.64       | 6.64       |
| LH <sub>3</sub>                                 | 12.71                | -           | -          | -          | 12.71                | -           | -          | -          | 12.71                | -           | -          | -          |
| VOLH                                            | 10.68                |             |            |            | 10.68                | 5.63        | 5.68       | 5.60       | 10.65                |             |            |            |
| VOL                                             | 7.50                 | 4.43        | 4.48       | 4.38       | 7.50                 | 4.43        | 4.48       | 4.38       | 7.85                 | 3.99        | 4.04       | 3.80       |
| VOLH <sub>1</sub>                               | 3.90                 | 1.36        | 1.40       | 1.38       | 3.90                 | 1.36        | 1.40       | 1.38       |                      |             |            |            |
| VOLH <sub>2</sub>                               | -5.60                |             |            |            | -5.60                |             |            |            | -5.7                 |             |            |            |
| (VO) <sub>2</sub> L <sub>2</sub> H <sub>1</sub> | 15.71                | 9.01        | 9.34       | 9.31       | 15.71                | 9.01        | 9.34       | 9.31       | 15.71                | 9.01        | 9.34       | 9.31       |
| (VO) <sub>2</sub> L <sub>2</sub> H <sub>2</sub> | 10.53                | 6.04        | 6.37       | 6.25       | 10.53                | 6.04        | 6.37       | 6.25       | 10.73                | 6.05        | 6.37       | 6.24       |
| (VO) <sub>2</sub> L <sub>2</sub> H <sub>3</sub> | 1.60                 | -0.47       | -0.49      | -0.82      | 1.60                 | -0.47       | -0.49      | -0.82      | 1.6                  | -0.48       | -0.49      | -0.81      |
| (VO) <sub>2</sub> L <sub>2</sub> H <sub>4</sub> |                      | -4.90       | -5.60      | -5.85      |                      | -4.90       | -5.60      | -5.85      |                      | -4.86       | -5.61      | -5.80      |
| VOL <sub>2</sub> H <sub>2</sub>                 | -2.89                | -2.22       | -2.22      | -2.28      | -2.89                | -2.22       | -2.22      | -2.28      | -2.89                |             |            |            |
| VOL <sub>2</sub> H <sub>3</sub>                 |                      | -13.04      | -13.00     | -13.58     |                      | -13.04      | -13.00     | -13.58     |                      |             |            |            |
| VOL <sub>2</sub> H <sub>4</sub>                 |                      | -24.58      | -24.56     | -24.66     |                      | -24.58      | -24.56     | -24.66     |                      |             |            |            |
| $\sigma$                                        | 1.2                  | 1.1         | 1.1        | 1.1        | 1.2                  | 1.8         | 1.8        | 1.8        | 2.2                  | 3.2         | 3.3        | 3.4        |
| X <sup>2</sup>                                  | 6.1                  | 5.1         | 5.1        | 5.1        | 6.1                  | 7.9         | 7.9        | 7.9        | 9.1                  | 9.2         | 9.3        | 9.4        |

<sup>a</sup> Model 1: final data reported in Table 1 of the manuscript. <sup>b</sup> Model 2: data with VOLH for tartrates. <sup>c</sup> Model 3: data reported in *Inorg. Chim. Acta*, 1995, **239**, 145.

**Table S-2** Structural parameters of 59 structures of VO(IV) complexes formed by bidentate ligand

| Ligand                                                                 | Donor set           | V-L <sub>eq</sub> <sup>a</sup> | V-L' <sub>ax</sub> <sup>a</sup> | $\Delta d^b$ | L <sub>eq</sub> -V-L <sub>eq</sub> <sup>c</sup> | L' <sub>ax</sub> -V-L' <sub>ax</sub> <sup>c</sup> | $\tau^d$ | Ref. |
|------------------------------------------------------------------------|---------------------|--------------------------------|---------------------------------|--------------|-------------------------------------------------|---------------------------------------------------|----------|------|
| Acetylacetonate                                                        | VO(O <sub>4</sub> ) | 1.96, 1.97                     | 1.96, 1.98                      | -0.0050      | 149.80                                          | 149.50                                            | 0.0050   | 1    |
| Acetylacetonate                                                        | VO(O <sub>4</sub> ) | 1.962, 1.974                   | 1.955, 1.983                    | -0.0010      | 149.60                                          | 145.50                                            | 0.0683   | 2    |
| Acetylacetonate                                                        | VO(O <sub>4</sub> ) | 1.967, 1.968                   | 1.969, 1.970                    | -0.0020      | 150.13                                          | 145.63                                            | 0.0750   | 3    |
| Acetylacetonate                                                        | VO(O <sub>4</sub> ) | 1.968, 1.969                   | 1.976, 1.977                    | -0.0080      | 150.24                                          | 146.20                                            | 0.0673   | 4    |
| Acetylacetonate                                                        | VO(O <sub>4</sub> ) | 1.969, 1.974                   | 1.976, 1.978                    | -0.0055      | 150.13                                          | 145.63                                            | 0.0750   | 5    |
| Acetylacetonate                                                        | VO(O <sub>4</sub> ) | 1.965, 1.967                   | 1.968, 1.972                    | -0.0040      | 150.24                                          | 145.63                                            | 0.0768   | 6    |
| Acetylacetonate                                                        | VO(O <sub>4</sub> ) | 1.973, 1.975                   | 1.980, 1.983                    | -0.0075      | 150.24                                          | 146.20                                            | 0.0673   | 7    |
| Acetylacetonate                                                        | VO(O <sub>4</sub> ) | 1.973, 1.975                   | 1.980, 1.982                    | -0.0070      | 150.27                                          | 146.29                                            | 0.0663   | 7    |
| Acetylacetonate                                                        | VO(O <sub>4</sub> ) | 1.970, 1.973                   | 1.978, 1.980                    | -0.0075      | 150.23                                          | 146.35                                            | 0.0647   | 7    |
| Acetylacetonate                                                        | VO(O <sub>4</sub> ) | 1.968, 1.972                   | 1.976, 1.979                    | -0.0075      | 150.25                                          | 146.40                                            | 0.0642   | 7    |
| Acetylacetonate                                                        | VO(O <sub>4</sub> ) | 1.971, 1.976                   | 1.973, 1.977                    | -0.0015      | 150.26                                          | 146.42                                            | 0.0640   | 7    |
| Catecholate                                                            | VO(O <sub>4</sub> ) | 1.958, 1.959                   | 1.933, 1.959                    | 0.0125       | 149.95                                          | 141.08                                            | 0.1478   | 8    |
| 2,2,6,6-Tetramethylheptane-3,5-dionate                                 | VO(O <sub>4</sub> ) | 1.957, 1.965                   | 1.952, 1.972                    | -0.0010      | 147.39                                          | 145.89                                            | 0.0250   | 9    |
| 2,2,6,6-Tetramethylheptane-3,5-dionate                                 | VO(O <sub>4</sub> ) | 1.967, 1.972                   | 1.963, 1.980                    | -0.0020      | 147.63                                          | 146.04                                            | 0.0265   | 5    |
| <i>N,N</i> -Dimethylacetylacetamidate-O,O'                             | VO(O <sub>4</sub> ) | 1.958, 1.966                   | 1.959, 1.976                    | -0.0035      | 145.08                                          | 144.97                                            | 0.0018   | 10   |
| <i>N</i> -Diphenylphosphoryl- <i>P,P</i> -diphenylphosphinimidate-O,O' | VO(O <sub>4</sub> ) | 1.982, 1.987                   | 1.977, 1.984                    | 0.0040       | 152.30                                          | 143.60                                            | 0.1450   | 11   |
| 3-Ethyl-2,4-pentanedionate-O,O'                                        | VO(O <sub>4</sub> ) | 1.962, 1.965                   | 1.962, 1.966                    | -0.0005      | 147.86                                          | 146.56                                            | 0.0217   | 12   |
| 3-Methyl-2,4-pentanedionate-O,O'                                       | VO(O <sub>4</sub> ) | 1.956, 1.958                   | 1.958, 1.971                    | -0.0075      | 149.61                                          | 143.45                                            | 0.1027   | 12   |
| ( <i>S</i> )-2-Diphenylphosphinoyl-1,1'-binaphthalene-2'-olate         | VO(O <sub>4</sub> ) | 2.042                          | 1.901                           | 0.1410       | 156.50                                          | 133.80                                            | 0.3783   | 13   |
| Benzilate                                                              | VO(O <sub>4</sub> ) | 1.970, 1.973                   | 1.900, 1.931                    | 0.0560       | 151.62                                          | 132.93                                            | 0.3115   | 14   |

| Ligand                                                                                 | Donor set                          | V-L <sub>eq</sub> <sup>a</sup> | V-L' <sub>ax</sub> <sup>a</sup> | $\Delta d^b$ | L <sub>eq</sub> -V-L <sub>eq</sub> <sup>c</sup> | L' <sub>ax</sub> -V-L' <sub>ax</sub> <sup>c</sup> | $\tau^d$ | Ref. |
|----------------------------------------------------------------------------------------|------------------------------------|--------------------------------|---------------------------------|--------------|-------------------------------------------------|---------------------------------------------------|----------|------|
| 2-Ethyl-2-hydroxybutanoate                                                             | VO(O <sub>4</sub> )                | 1.954, 1.977                   | 1.882, 1.986                    | 0.0315       | 147.80                                          | 136.31                                            | 0.1915   | 15   |
| 1,3-Dithiolan-2-ylidenemalonate-O,O'                                                   | VO(O <sub>4</sub> )                | 1.946                          | 1.941                           | 0.0050       | 157.94                                          | 155.04                                            | 0.0483   | 16   |
| 1,3-dithiolan-2-ylidenemalonate-O,O'                                                   | VO(O <sub>4</sub> )                | 1.952, 1.955                   | 1.940, 1.943                    | 0.0120       | 145.80                                          | 142.47                                            | 0.0555   | 16   |
| 6-(Phenylamino)hex-5-ene-2,4-dionate-O,O'                                              | VO(O <sub>4</sub> )                | 1.972, 1.978                   | 1.944, 1.952                    | 0.0270       | 151.90                                          | 141.90                                            | 0.1667   | 17   |
| 1-Phenyl-1,3-butanedionate                                                             | VO(O <sub>4</sub> )                | 1.946, 1.969                   | 1.953, 1.972                    | -0.0050      | 150.10                                          | 146.80                                            | 0.0550   | 2    |
| 1,3-Diphenyl-1,3-propanedionate                                                        | VO(O <sub>4</sub> )                | 1.941, 1.944                   | 1.941, 1.957                    | -0.0065      | 147.22                                          | 145.93                                            | 0.0215   | 18   |
| Maltolate                                                                              | VO(O <sub>4</sub> )                | 1.998, 2.024                   | 1.958, 1.971                    | 0.0465       | 146.80                                          | 140.60                                            | 0.1033   | 19   |
| <i>N</i> -(2-(2-((Methylthio)thiocarbonyl)cyclopent-1-yl)amino)ethyl)salicylaldiminate | VO(N <sub>2</sub> O <sub>2</sub> ) | 2.099                          | 1.915                           | 0.1840       | 163.61                                          | 130.99                                            | 0.5437   | 20   |
| <i>N</i> -(Salicylidene)propylamine                                                    | VO(N <sub>2</sub> O <sub>2</sub> ) | 2.107, 2.126                   | 1.898, 1.904                    | 0.2155       | 161.88                                          | 130.42                                            | 0.5243   | 21   |
| 2-(4,4-Dimethyl-4,5-dihydro-oxazol-2-yl)phenolate-N,O                                  | VO(N <sub>2</sub> O <sub>2</sub> ) | 2.102, 2.106                   | 1.909, 1.917                    | 0.1910       | 165.36                                          | 129.64                                            | 0.5953   | 22   |
| 2-(5,6-Dihydro-4H-1,3oxazin-2-yl-)phenolate-N,O                                        | VO(N <sub>2</sub> O <sub>2</sub> ) | 2.079, 2.086                   | 1.883, 1.883                    | 0.1995       | 165.15                                          | 127.67                                            | 0.6247   | 22   |
| <i>N</i> -(4-Chlorophenyl)-salicylideneiminato                                         | VO(N <sub>2</sub> O <sub>2</sub> ) | 2.145, 2.154                   | 1.899, 1.904                    | 0.2480       | 159.12                                          | 133.13                                            | 0.4332   | 23   |
| 2-(2-Oxyphenyl)-2-oxazolate                                                            | VO(N <sub>2</sub> O <sub>2</sub> ) | 2.061, 2.069                   | 1.926, 1.930                    | 0.1370       | 151.48                                          | 142.77                                            | 0.1452   | 24   |
| 2-(2'-Oxyphenyl)-2-thiazolate                                                          | VO(N <sub>2</sub> O <sub>2</sub> ) | 2.083                          | 1.900, 1.903                    | 0.1815       | 161.44                                          | 129.90                                            | 0.5257   | 24   |
| 2-(Dimethylaminomethyl)phenolate-O,N                                                   | VO(N <sub>2</sub> O <sub>2</sub> ) | 2.147, 2.155                   | 1.883, 1.897                    | 0.2610       | 165.13                                          | 130.02                                            | 0.5852   | 25   |
| <i>N</i> -(2-oxido-5-chlorosalicylidene)-(S)-1-phenylethylamine                        | VO(N <sub>2</sub> O <sub>2</sub> ) | 2.076, 2.085                   | 1.912, 1.915                    | 0.1670       | 164.87                                          | 125.25                                            | 0.6603   | 26   |
| <i>N</i> -(2-oxido-5-chlorosalicylidene)-(S)-1-phenylethylamine                        | VO(N <sub>2</sub> O <sub>2</sub> ) | 2.092, 2.095                   | 1.914, 1.918                    | 0.1775       | 164.54                                          | 127.46                                            | 0.6180   | 26   |
| <i>N</i> -(2-oxidonaphthylmethylidene)-(S)-1-phenylethylamine                          | VO(N <sub>2</sub> O <sub>2</sub> ) | 2.065, 2.085                   | 1.900, 1.904                    | 0.1730       | 161.97                                          | 123.18                                            | 0.6465   | 26   |
| <i>N</i> -(2-oxidonaphthylmethylidene)-(S)-1-phenylethylamine                          | VO(N <sub>2</sub> O <sub>2</sub> ) | 2.085, 2.100                   | 1.910, 1.913                    | 0.1810       | 161.45                                          | 127.42                                            | 0.5672   | 26   |
| <i>N</i> -(2-oxido-salicylidene)-(R)-1-phenylethylamine                                | VO(N <sub>2</sub> O <sub>2</sub> ) | 2.100, 2.112                   | 1.905, 1.910                    | 0.1985       | 159.65                                          | 133.28                                            | 0.4395   | 26   |
| 2-Salicylideneaminato-1-hydroxyethane-N,O                                              | VO(N <sub>2</sub> O <sub>2</sub> ) | 2.096, 2.112                   | 1.892, 1.901                    | 0.2075       | 159.66                                          | 135.29                                            | 0.4062   | 27   |

| Ligand                                                                        | Donor set                          | V-L <sub>eq</sub> <sup>a</sup> | V-L' <sub>ax</sub> <sup>a</sup> | $\Delta d^b$ | L <sub>eq</sub> -V-L <sub>eq</sub> <sup>c</sup> | L' <sub>ax</sub> -V-L' <sub>ax</sub> <sup>c</sup> | $\tau^d$ | Ref. |
|-------------------------------------------------------------------------------|------------------------------------|--------------------------------|---------------------------------|--------------|-------------------------------------------------|---------------------------------------------------|----------|------|
| 2-Methyl-8-quinolinolate                                                      | VO(N <sub>2</sub> O <sub>2</sub> ) | 2.136                          | 1.921                           | 0.2150       | 160.98                                          | 127.16                                            | 0.5637   | 28   |
| <i>N</i> -Methylsalicylaldimine                                               | VO(N <sub>2</sub> O <sub>2</sub> ) | 2.105                          | 1.907                           | 0.1980       | 162.47                                          | 129.56                                            | 0.5485   | 29   |
| <i>N</i> -Isopropyl- <i>o</i> -methylsalicylaldimine                          | VO(N <sub>2</sub> O <sub>2</sub> ) | 2.096                          | 1.912, 1.915                    | 0.1825       | 164.17                                          | 129.32                                            | 0.5808   | 29   |
| <i>N</i> -Methyl- <i>o</i> - <i>t</i> -butyl- <i>p</i> -methylsalicylaldimine | VO(N <sub>2</sub> O <sub>2</sub> ) | 2.076, 2.089                   | 1.900, 1.903                    | 0.1810       | 165.75                                          | 123.99                                            | 0.6960   | 29   |
| 2-Methyl-5-methylthio-8-hydroxyquinolate                                      | VO(N <sub>2</sub> O <sub>2</sub> ) | 2.104, 2.106                   | 1.934, 1.970                    | 0.1530       | 157.89                                          | 127.91                                            | 0.4997   | 30   |
| 2-Methyl-5-methylthio-8-hydroxyquinolate                                      | VO(N <sub>2</sub> O <sub>2</sub> ) | 2.111, 2.122                   | 1.923, 1.948                    | 0.1810       | 158.71                                          | 127.48                                            | 0.5205   | 30   |
| 2-((1 <i>S</i> ,2 <i>S</i> ,5 <i>R</i> )-(-)-Menthol)-pyridine                | VO(N <sub>2</sub> O <sub>2</sub> ) | 2.078                          | 1.8770                          | 0.2010       | 150.22                                          | 132.93                                            | 0.2882   | 31   |
| 4-Trifluoromethoxysalicylideneaminato-N,O                                     | VO(N <sub>2</sub> O <sub>2</sub> ) | 2.110, 2.121                   | 1.891, 1.904                    | 0.2180       | 157.40                                          | 132.19                                            | 0.4202   | 32   |
| 2-(5-Ethyl-oxazoliny)phenylate                                                | VO(N <sub>2</sub> O <sub>2</sub> ) | 2.050, 2.087                   | 1.921, 1.923                    | 0.1465       | 153.33                                          | 139.82                                            | 0.2252   | 33   |
| 2-(5-Isopropyl-oxazoliny)phenylate                                            | VO(N <sub>2</sub> O <sub>2</sub> ) | 2.068, 2.075                   | 1.915, 1.916                    | 0.1560       | 155.83                                          | 133.24                                            | 0.3765   | 33   |
| Salicylideneimine                                                             | VO(N <sub>2</sub> O <sub>2</sub> ) | 2.056, 2.058                   | 1.917, 1.920                    | 0.1385       | 152.29                                          | 139.21                                            | 0.2180   | 34   |
| 2-(Piperid-1-ylmethyl)-4-methylphenolate-N,O                                  | VO(N <sub>2</sub> O <sub>2</sub> ) | 2.165, 2.165                   | 1.883, 1.899                    | 0.2740       | 161.17                                          | 131.20                                            | 0.4995   | 35   |
| 2-((Dimethylamino)methyl)-6- <i>t</i> -butylphenolate-N,O                     | VO(N <sub>2</sub> O <sub>2</sub> ) | 2.150, 2.151                   | 1.904, 1.912                    | 0.2425       | 173.25                                          | 125.33                                            | 0.7987   | 35   |
| 2-(( <i>S</i> )-1-(Dimethylamino)ethyl)phenolate-N,O                          | VO(N <sub>2</sub> O <sub>2</sub> ) | 2.164, 2.169                   | 1.900, 1.904                    | 0.2645       | 160.15                                          | 130.78                                            | 0.4895   | 35   |
| 2-(( <i>R</i> )-1-(Dimethylamino)ethyl)phenolate-N,O                          | VO(N <sub>2</sub> O <sub>2</sub> ) | 2.154, 2.164                   | 1.898, 1.901                    | 0.2595       | 160.37                                          | 130.99                                            | 0.4897   | 35   |
| Ethane-1,2-dithiolate-S,S'                                                    | VO(S <sub>4</sub> )                | 2.376, 2.388                   | 2.370, 2.377                    | 0.0085       | 151.92                                          | 142.75                                            | 0.1528   | 36   |
| Ethane-1,2-dithiolate-S,S'                                                    | VO(S <sub>4</sub> )                | 2.376, 2.388                   | 2.370, 2.377                    | 0.0085       | 151.89                                          | 142.72                                            | 0.1528   | 37   |
| Diethyldithiocarbamate                                                        | VO(S <sub>4</sub> )                | 2.404, 2.406                   | 2.387, 2.410                    | 0.0065       | 145.15                                          | 141.46                                            | 0.0615   | 38   |

<sup>a</sup> Measured in Å; <sup>b</sup>  $\Delta d$  is the difference between the mean axial and the mean equatorial bond distance:  $\Delta d = [d_{\text{mean}}(\text{V-L}'_{\text{ax}}) - d_{\text{mean}}(\text{V-L}_{\text{eq}})]$ ; <sup>c</sup> Measured in °; <sup>d</sup> Distortion towards the trigonal bipyramid:  $\tau = \{[L'_{\text{ax}}-\text{V}-L'_{\text{ax}}] - [L_{\text{eq}}-\text{V}-L_{\text{eq}}]\}/60$ .

**Table S-3** Structural parameters of the dinuclear VO(IV) complexes formed by tartrates and their derivatives

| Complex <sup>a</sup>                                                                                                   | V-O(hydr) <sub>eq</sub> <sup>b</sup> | V-O(carb) <sub>ax</sub> <sup>b</sup> | O-V-O(hydr) <sub>eq</sub> <sup>c</sup> | O-V-O(carb) <sub>ax</sub> <sup>c</sup> | $\tau$ <sup>d</sup> | Ref. |
|------------------------------------------------------------------------------------------------------------------------|--------------------------------------|--------------------------------------|----------------------------------------|----------------------------------------|---------------------|------|
| (NH <sub>4</sub> ) <sub>4</sub> [(VO) <sub>2</sub> (L-tartH <sub>-1</sub> ) <sub>2</sub> ] $\cdot$ 2H <sub>2</sub> O   | 1.787, 1.932                         | 2.008, 2.028                         | 123.19                                 | 161.94                                 | 0.646               | 39   |
| Rb <sub>4</sub> [(VO) <sub>2</sub> (D-tartH <sub>-1</sub> ) <sub>2</sub> ] $\cdot$ 2H <sub>2</sub> O                   | 1.884, 1.910                         | 1.999, 2.057                         | 124.5                                  | 159.8                                  | 0.588               | 40   |
| Cs <sub>4</sub> [(VO) <sub>2</sub> (D-tartH <sub>-1</sub> ) <sub>2</sub> ] $\cdot$ 3H <sub>2</sub> O                   | 1.893, 1.914                         | 2.006, 2.024                         | 125.0                                  | 160.3                                  | 0.588               | 40   |
| (Na) <sub>4</sub> [(VO) <sub>2</sub> (L-tartH <sub>-1</sub> ) <sub>2</sub> ] $\cdot$ 6H <sub>2</sub> O                 | 1.890, 1.894                         | 2.012, 2.016                         | 124.98                                 | 163.04                                 | 0.634               | 41   |
| Na <sub>4</sub> [(VO) <sub>2</sub> (DL-tartH <sub>-1</sub> ) <sub>2</sub> ] $\cdot$ 12H <sub>2</sub> O                 | 1.902, 1.917                         | 1.994, 2.004                         | 143.7                                  | 150.5                                  | 0.113               | 42   |
| (NEt <sub>4</sub> ) <sub>4</sub> [(VO) <sub>2</sub> (DL-tartH <sub>-1</sub> ) <sub>2</sub> ] $\cdot$ 8H <sub>2</sub> O | 1.913, 1.955                         | 2.021, 2.026                         | 145.7                                  | 154.1                                  | 0.140               | 43   |
| Rb <sub>4</sub> [(VO) <sub>2</sub> (DL-tartH <sub>-1</sub> ) <sub>2</sub> ] $\cdot$ 2H <sub>2</sub> O                  | 1.916, 1.918                         | 1.989, 2.002                         | 145.1                                  | 145.2                                  | 0.002               | 40   |
| Cs <sub>4</sub> [(VO) <sub>2</sub> (DL-tartH <sub>-1</sub> ) <sub>2</sub> ] $\cdot$ 2H <sub>2</sub> O                  | 1.908, 1.920                         | 1.997, 2.001                         | 145.5                                  | 146.5                                  | 0.017               | 40   |
| {(Ba) <sub>2</sub> [(VO) <sub>2</sub> (DL-tartH <sub>-1</sub> ) <sub>2</sub> ] $\cdot$ 2H <sub>2</sub> O} <sub>n</sub> | 1.913, 1.927                         | 1.940, 1.995                         | 144.5                                  | 146.4                                  | 0.032               | 44   |
| (Na) <sub>4</sub> [(VO) <sub>2</sub> (DL-dmtH <sub>-1</sub> ) <sub>2</sub> ]                                           | 1.964, 1.974                         | 1.981, 2.015                         | 151.4                                  | 158.7                                  | 0.122               | 45   |
| (Na) <sub>4</sub> [(VO) <sub>2</sub> (DL-mmtH <sub>-1</sub> ) <sub>2</sub> ] $\cdot$ 14H <sub>2</sub> O                | 1.904, 1.912                         | 1.979, 1.991                         | 144.5                                  | 149.2                                  | 0.078               | 46   |
| (Na) <sub>4</sub> [(VO) <sub>2</sub> (DL-dmtH <sub>-1</sub> ) <sub>2</sub> ] $\cdot$ 6H <sub>2</sub> O                 | 1.946, 1.956                         | 1.969, 2.030                         | 151.2                                  | 160.3                                  | 0.152               | 47   |

<sup>a</sup> dmt = dimethyltartrato(2-); mmt = *threo*-monomethyltartrato(2-); <sup>b</sup> Measured in Å; <sup>c</sup> Measured in °; <sup>d</sup> Distortion towards the trigonal bipyramid:  $\tau = \{[\text{O-V-O}(\text{carb})_{\text{ax}}] - [\text{O-V-O}(\text{hydr})_{\text{eq}}]\}/60$ .

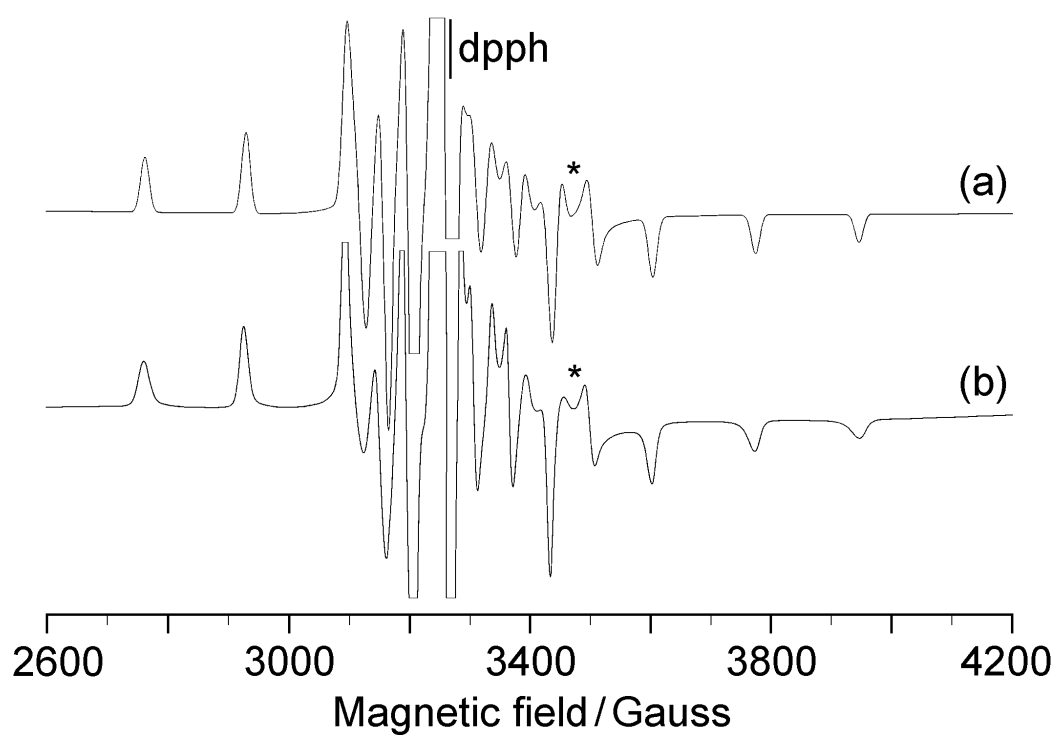

**Fig. S-1** X-band anisotropic EPR spectrum of  $[\text{VO}(\text{citrH}_{-1})_2]^{6-}$  recorded at 120 K on aqueous solution of VO(IV) and citrate at pH 8.30 with a ligand to metal molar ratio of 500:1 and a VO(IV) concentration of 4 mM: (a) simulated spectrum and (b) experimental spectrum. The region indicated with an asterisk is that where it is more easily observable the anisotropy of x and y axes.

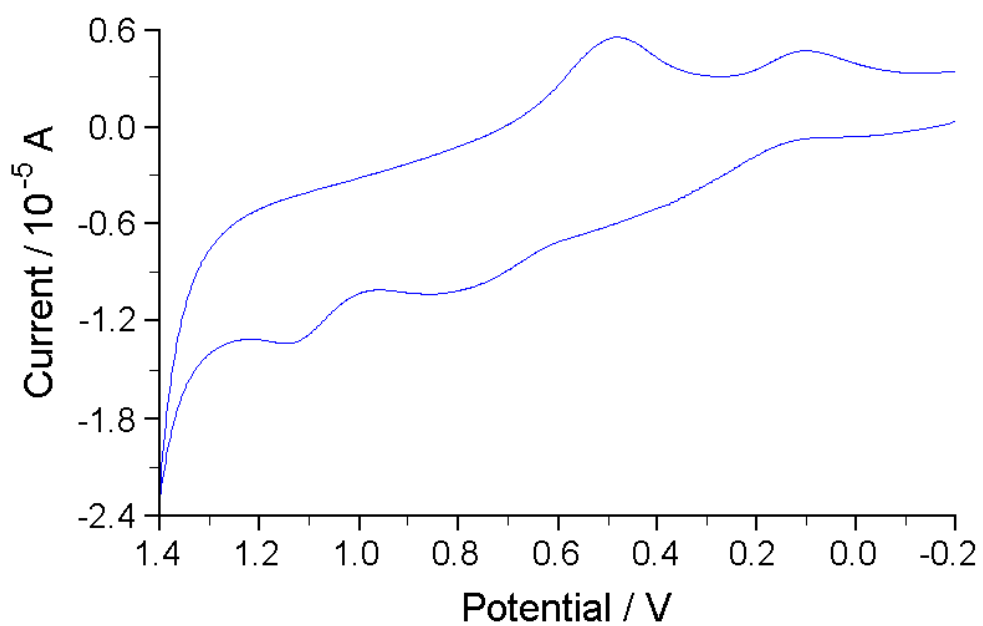

**Fig. S-2** Cyclic voltammogram of  $[(VO)_2(L-tartH_{-1})_2]^{4-}$  complex recorded at 25 °C on an aqueous solution of VO(IV) and L-tartrate: pH 9.0, ligand to metal molar ratio 1:1, VO(IV) concentration 5 mM. Au was used as working electrode and the potential  $E$  was measured vs. Ag/AgCl reference.

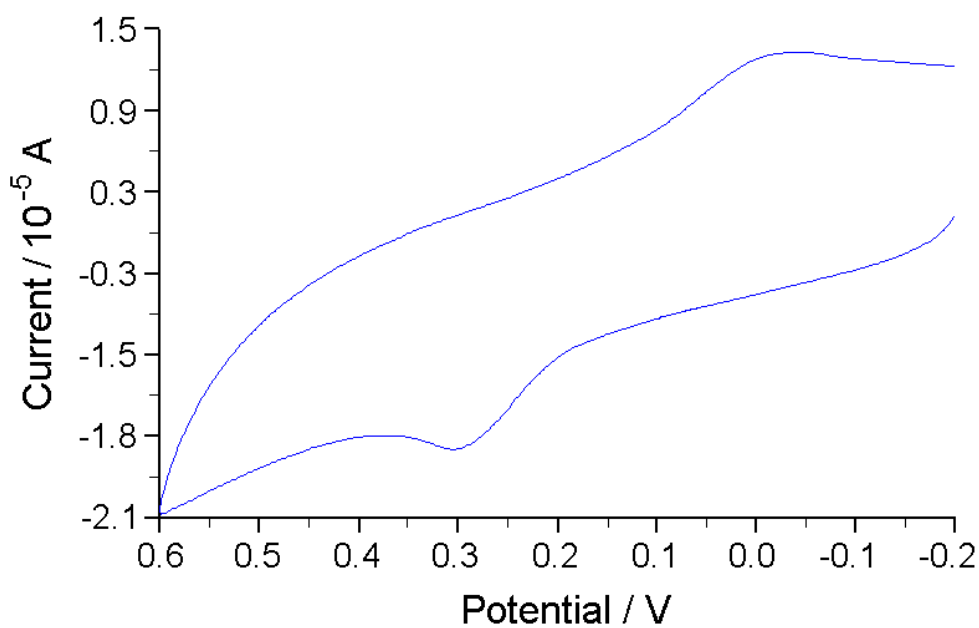

**Fig. S-3** Cyclic voltammogram of  $[\text{VO}(\text{L-tartH}_{-1})_2]^{4-}$  complex recorded at 25 °C on an aqueous solution of VO(IV) and L-tartrate: pH 8.5, ligand to metal molar ratio 100:1, VO(IV) concentration 5 mM. Au was used as working electrode and the potential  $E$  was measured vs. Ag/AgCl reference



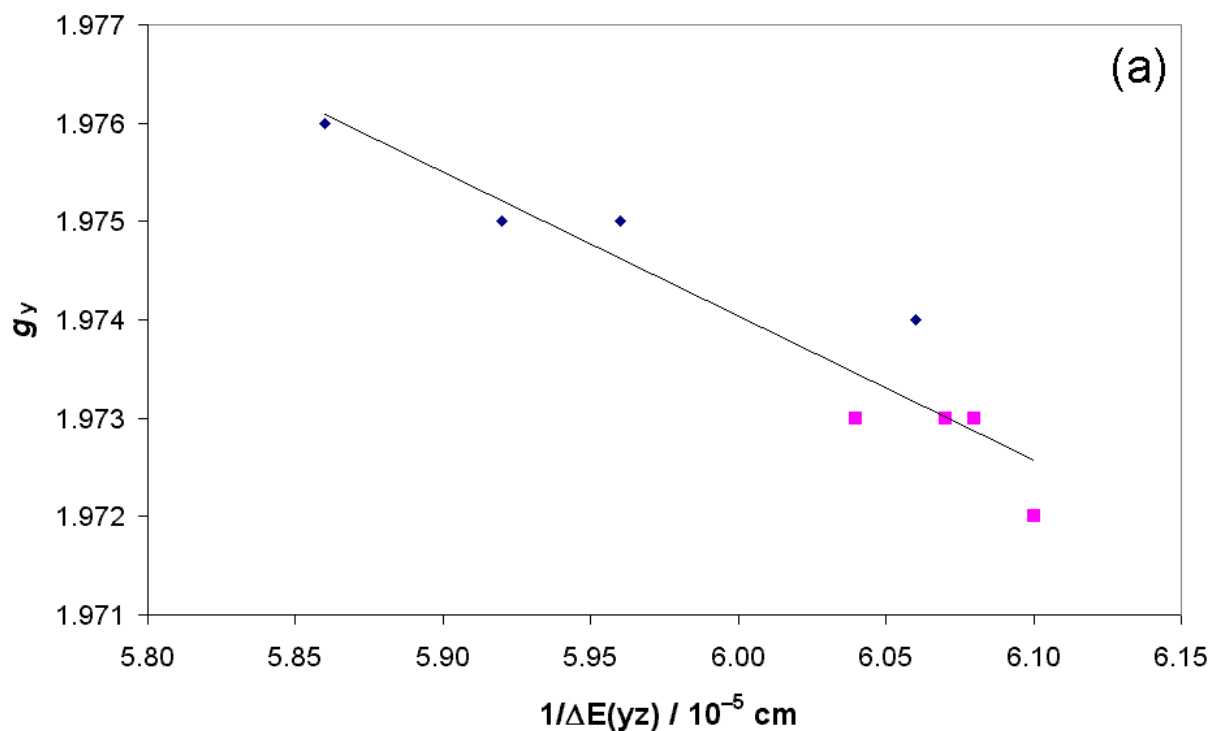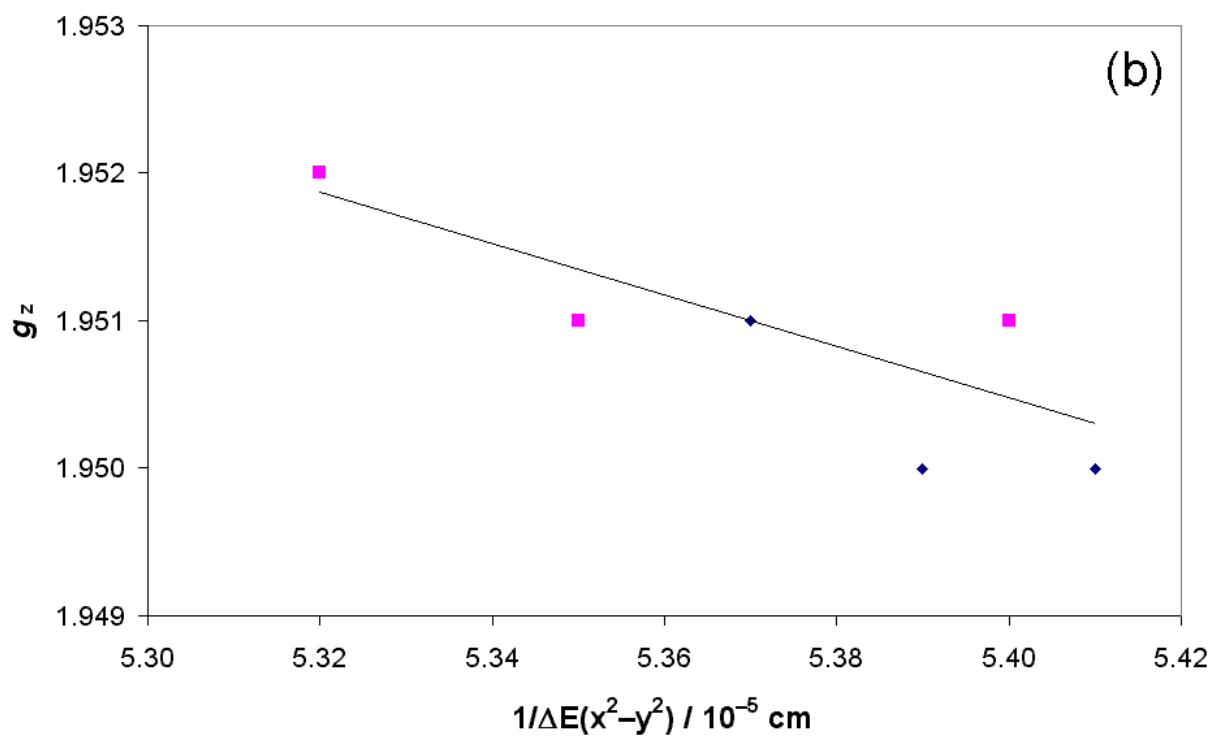

**Fig. S-4** Plot of the  $g_y$  (a) and  $g_z$  value (b) as a function of reciprocal value of energy difference between the  $d_{yz}$  and  $d_{xy}$  atomic orbital  $\Delta E(yz)$  (a) and  $d_{x^2-y^2}$  and  $d_{xy}$  atomic orbital,  $\Delta E(x^2-y^2)$  (b). With the blue rhombi are represented the values for glycolate, 2-hydroxyisobutirate, 2-ethyl-2-hydroxybutirate and benzilate taken from ref. 25 of the manuscript, and with the pink squares the values for citrate and tartrates (see Tables 3 and 4 of the manuscript).

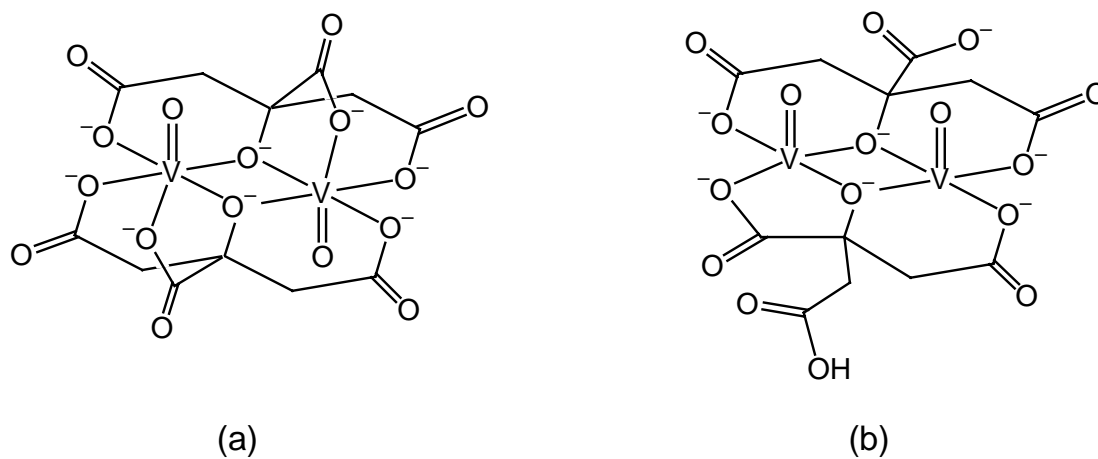

**Scheme S-1** Dinuclear VO(IV) complexes formed by citrate in an equimolar solution: (a)  $[(VO)_2(LH_{-1})_2]^{4-}$  and (b)  $[(VO)_2L(LH_{-1})]^{3-}$ .

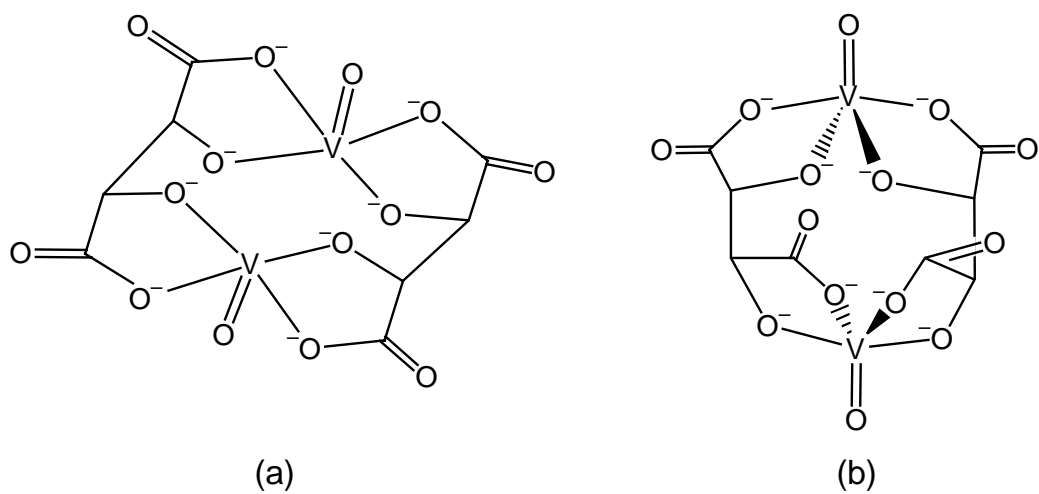

**Scheme S-2.** Dinuclear  $[(VO)_2(LH_{-1})_2]^{4-}$  complexes formed by tartrates in an equimolar solution: (a) structure formed by D- or L-tartrate and (b) structure formed by DL-tartrate.

## References

- 1 P. Dodge, D. H. Templeton and A. Zalkin, *J. Chem. Phys.*, 1961, **35**, 55
- 2 P. Hon, R. L. Belford and C. E. Pfluger, *J. Chem. Phys.*, 1965, **43**, 3111.
- 3 E. Shuter, S. J. Rettig and C. Orvig, *Acta Crystallogr. Sect. C*, 1995, **51**, 12.
- 4 A. H. Mahmoudkhani, B. Casari and V. Langer, *Z. Kristallogr.- New Cryst. Struct.*, 2001, **216**, 205.
- 5 M. A. K. Ahmed, H. Fjellvag, A. Kjekshus and B. Klewe, *Z. Anorg. Allg. Chem.*, 2004, **630**, 2311.
- 6 E. V. Fedorova, V. B. Rybakov, V. M. Senyavin, A. V. Anisimov and L. A. Aslanov, *Kristallografiya*, 2005, **50**, 256.
- 7 M. Hoshino, A. Sekine, H. Uekusa and Y. Ohashi, *Chem. Lett.*, 2005, **34**, 1228.
- 8 S. R. Cooper, Y. B. Koh and K. N. Raymond, *J. Am. Chem. Soc.*, 1982, **104**, 5092.
- 9 U. K. Urs, K. C. Anitha, K. Lakshmi Raghunathan, S. A. Shivashankar, W. T. Robinson and T. N. Guru Row, *Acta Crystallogr. Sect. E*, 2001, **57**, m242.
- 10 D. C. Crans, A. R. Khan, M. Mahroof-Tahir, S. Mondal, S. M. Miller, A. la Cour, O. P. Anderson, T. Jakusch and T. Kiss, *Dalton Trans.*, 2001, 3337.
- 11 M. Rietzel, H. W. Roesky, K. V. Katti, M. Noltemeyer, M. C. R. Symons and A. Abu-Raqabah *J. Chem. Soc., Dalton Trans.*, 1991, 1285.
- 12 S. S. Amin, K. Cryer, B. Zhang, S. K. Dutta, S.S. Eaton, O. P. Anderson, S. M. Miller, B. A. Reul, S. M. Brichard and D. C. Crans, *Inorg. Chem.*, 2000, **39**, 406.
- 13 R. J. Cross, L. J. Farrugia, P. D. Newman, R. D. Peacock and D. Stirling, *J. Chem. Soc., Dalton Trans.*, **1996**, 4449.
- 14 N. D. Chasteen, R. L. Belford and I. C. Paul, *Inorg. Chem.*, 1969, **8**, 408.
- 15 G. Barr-David, T. W. Hambley, J. A. Irwin, R. J. Judd, P. A. Lay, B. D. Martin, R. Bramley, N. E. Dixon, P. Hendry, J.-Y. Ji, R. S. U. Baker and A. M. Bonin, *Inorg. Chem.*, 1992, **31**, 4906.
- 16 K. M. Kim, D. Lee, M. S. Seo, H. Park, R. Song, M.-J. Jun and W. Nam, *Dalton Trans.*, 2005, 1567.
- 17 D. I. Arnold, F. A. Cotton, J. H. Matonic and C. A. Murillo, *Chem. Commun.*, 1996, 2113.
- 18 U. Schilde, W. Banske, E. Ludwig and E. Uhlemann, *Z. Kristallogr.*, 1995, **210**, 627.
- 19 P. Caravan, L. Gelmini, N. Glover, F. G. Herring, H. Li, J. H. McNeill, S. J. Rettig, I. A. Setyawati, E. Shuter, Y. Sun, A. S. Tracey, V. G. Yuen and C. Orvig, *J. Am. Chem. Soc.*, 1995, **117**, 12759.

- 20 S. Bhattacharyya, S. Mukhopadhyay, S. Samanta, T. J. R. Weakley and M. Chaudhury, *Inorg. Chem.*, 2002, **41**, 2433.
- 21 H. Elias, S. Schwartz-Eidam and K. J. Wannowius, *Inorg. Chem.*, 2003, **42**, 2878.
- 22 K. Kandasamy, H. B. Singh, R. J. Butcher and J. P. Jasinski, *Inorg. Chem.*, 2004, **43**, 5704.
- 23 M. Pasquali, F. Marchetti, C. Floriani and S. Merlino, *J. Chem. Soc., Dalton Trans.*, 1977, 139.
- 24 M. Melchior, K. H. Thompson, J. M. Jong, S. J. Rettig, E. Shuter, V. G. Yuen, Y. Zhou, J. H. McNeill and C. Orvig, *Inorg. Chem.*, 1999, **38**, 2288.
- 25 H. Hagen, A. Barbon, E. E. van Faassen, B. T. G. Lutz, J. Boersma, A. L. Spek and G. van Koten, *Inorg. Chem.*, 1999, **38**, 4079.
- 26 G. Santoni and D. Rehder, *J. Inorg. Biochem.*, 2004, **98**, 758.
- 27 C. J. Carrano, C. M. Nunn, R. Quan, J. A. Bonadies and V. L. Pecoraro, *Inorg. Chem.*, 1990, **29**, 944.
- 28 M. Shiro and Q. Fernando, *Anal. Chem.*, 1971, **43**, 1222.
- 29 C. R. Cornman, K. M. Geiser-Bush, S. P. Rowley and P. D. Boyle, *Inorg. Chem.*, 1997, **36**, 6401.
- 30 L. Pech, Yy. Bankovsky, V. Belsky, J. Ashaks and A. Sobolev, *Latv. Khim. Zh.*, 1997, 64.
- 31 S. Bellemin-Laponnaz, K. S. Coleman and J. A. Osborn, *Polyhedron*, 1999, **18**, 2533.
- 32 J. Burgess, J. Fawcett, V. Palma and S. R. Gilani *Acta Crystallogr. Sect. C*, 2001, **57**, 277.
- 33 C. Bolm, T.-K.-K.- Luong and K. Harms, *Chem. Ber.*, 1997, **130**, 887.
- 34 N. Choudhary, D. L. Hughes, U. Kleinkes, L. F. Larkworthy, G. J. Leigh, M. Maiwald, C. J. Marmion, J. R. Sanders, G. W. Smith and C. Sudbrake, *Polyhedron*, 1997, **16**, 1517.
- 35 H. Hagen, S. Reinoso, E. J. Reijerse, E. E. van Faassen, M. Lutz, A. L. Spek and G. van Koten, *Z. Anorg. Allg. Chem.*, 2004, **630**, 2097.
- 36 R. W. Wiggins, J. C. Huffman and G. Christou, *Chem. Commun.*, 1983, 1313.
- 37 J. K. Money, J. C. Huffman and G. Christou, *Inorg. Chem.*, 1985, **24**, 3297.
- 38 K. Henrick, C. L. Raston and A. H. White, *J. Chem. Soc., Dalton Trans.*, 1976, 26.
- 39 J. G. Forrest and C. K. Prout, *J. Chem. Soc. (A)*, 1967, 1312.
- 40 J. T. Wroblewski, and M. R. Thompson, *Inorg. Chim. Acta*, 1988, **150**, 269.
- 41 J. L. Pizarro, J. García-Jaca, T. Rojo and M. I. Arriortua, *Acta Crystallogr. Sect. C*, 1994, **50**, 1394.
- 42 R. E. Tapscott, R. L. Belford and I. C. Paul, *Inorg. Chem.*, 1968, **7**, 356.
- 43 R. B. Ortega, C. F. Campana and R. E. Tapscott, *Acta Crystallogr. Sect. B*, 1980, **36**, 1786.
- 44 J. García-Jaca, M. Insausti, R. Cortes, T. Rojo, J. L. Pizarro and M. I. Arriortua, *Polyhedron*, 1994, **13**, 357.

- 45 S. K. Hahs, R. B. Ortega, R. E. Tapscott, C. F. Campana and B. Morosin, *Inorg. Chem.*, 1982, **21**, 664.
- 46 R. B. Ortega, R. E. Tapscott and C. F. Campana, *Inorg. Chem.*, 1982, **21**, 672.
- 47 H. D. Beeson, R. E. Tapscott and E. N. Duesler, *Inorg. Chim. Acta*, 1985, **102**, 5.
